# Supplementary material
Source: Royal Society of Chemistry journal article supplement (doi:10.1039/d6ta01656a)
Supplement: d6ta01656a1.pdf [file d6ta01656a1.pdf]

*Supporting Information*

*for*

**Proton-coupled electroreduction of nitrate on  $\alpha$ -SnWO<sub>4</sub> and  
photon-assisted enhancement of ammonia formation**

Dikshita Garg,<sup>a</sup> Praveen Kumar,<sup>a</sup> Anubha Rajput,<sup>a</sup> Rupali Gupta<sup>b</sup> and Biswarup Chakraborty\*<sup>a</sup>

<sup>a</sup>Department of Chemistry, Indian Institute of Technology Delhi, Hauz Khas, New Delhi – 110016, India

<sup>b</sup>Department of Chemistry, Mahanth Mahadevan Mahila College, Veer Kunwar Singh University, Ara, Bihar – 802301, India

\*[cbiswarup@chemistry.iitd.ac.in](mailto:cbiswarup@chemistry.iitd.ac.in)

## Table of Contents

|                                                                                 |         |
|---------------------------------------------------------------------------------|---------|
| 1. Experimental section                                                         | S3-S7   |
| 2. Table of comparison with some reported catalysts                             | S8      |
| 3. Material Characterization and Quantification data with corresponding figures | S8-S18  |
| 4. Post-catalysis data and corresponding figures                                | S18-S21 |
| 5. Electrokinetics data and corresponding figures                               | S22-S25 |
| 6. References                                                                   | S26     |

## Experimental Section.

### Instrumental details for the material characterizations.

**Fourier Transform Infrared Spectroscopy (FTIR).** The FTIR measurements were carried out with pellets made by using a sample (~0.1 mg) and KBr powder (~2 mg). The sample and KBr powder were ground in a mortar and pestle properly, and the pellet was prepared by applying hydraulic pressure at a 3-ton pressure. The FTIR measurements were carried out within the 4000-400  $\text{cm}^{-1}$  range.

**Raman Spectroscopy.** The Raman spectra were collected using a 532 nm high-resolution laser confocal fiber Raman spectrometer (HORIBA EVOLUTION, HORIBA Jobinyvon, France). The spectra were recorded within the range (200  $\text{cm}^{-1}$  to 1600  $\text{cm}^{-1}$ ).

**Powder X-ray diffraction (PXRD).** The PXRD of the samples were collected using a Bruker D8-Advance X-ray diffractometer fitted with CuK ( $K_1 = 1.540598$ ,  $K_2 = 1.544426$ , K ratio 0.5,  $K_{av} = 1.541874$ ). The data were recorded with a step size of 3703 and a dwell time of 0.300 s/step within the 10-70°  $2\theta$  range.

**Field Emission Scanning electron microscopy (FESEM) and Energy dispersive X-ray spectroscopy (EDX).** The morphology study of the materials was conducted using a TESCAN and a model Magna FESEM instrument. The FESEM-EDX analyses were performed to analyze the morphology and elemental mapping of the materials.

**X-ray electron microscopy (XPS).** The XPS study of the materials was carried out using an ECSA+, Omicron nanotechnology, from Oxford Instrument Germany, equipped with an aluminium monochromator and an aluminium source (Al K radiation  $h\nu = 1486.7$  eV), and operated at 15 kV voltage and 15 mA current.

**Transmission Electron Microscopy (TEM).** High-resolution transmission electron microscopy (HRTEM) and TEM were performed using a Thermo Fisher Scientific microscope operating at 200 kV to analyse the material. The samples were prepared by drop-casting the material's suspension of 200  $\mu\text{L}$  in acetone on a carbon-coated copper grid (200 mesh, TED PELLA, INC). Before recording data, the TEM grids were allowed to dry at room temperature. The ImageJ software was used for data analysis.

**Contact Angle Measurement.** Contact angle measurements were carried out using a KRÜSS Drop Shape Analyzer DSA100M equipped with manual syringes for customized liquid dispensing. Pellets of pure powder samples were prepared by applying a hydraulic pressure of three tons to obtain a smooth, flat surface. For each measurement, deionized water ( $\text{H}_2\text{O}$ ) was used as the probe liquid and dispensed in manual syringe mode.

**Brunauer-Emmett-Teller (BET) analysis.** The  $\text{N}_2$  adsorption-desorption isotherm and pore size distribution measurements were recorded using the Quantachrome instruments NOVA 2000 multi-station nitrogen sorption analyzer standard model version 11.03. The samples were degassed in the cells of the BET instrument at 100 °C for 12 hr before the analysis.

**UV-Vis diffuse reflectance spectroscopy (DRS).** Diffuse reflectance spectroscopy (DRS) experiments were performed using a UV-2401 Shimadzu spectrophotometer with an

integrating sphere accessory, and BaSO<sub>4</sub> was used as a diffuse reflectance standard over 300-800 nm.

**UV-Vis absorption spectroscopy.** The UV-Vis absorption spectra were recorded using Agilent Cary 60 UV-Vis. For each data presented in the manuscript, the baseline was corrected using an in-built module provided by Agilent. All the UV data were collected using Agilent Quartz cells with a total cell volume of 3 mL and path length of 1 cm.

### **Electrochemical studies.**

A potentiostat (Gamry Instruments, controlled by Echem Analyst™ Software) was used to study the catalysts' electrochemical activity in a three-electrode setup consisting of Ag/AgCl (aq) as the reference electrode, graphite rod as the counter electrode, and material deposited on carbon cloth as the working electrode. To prepare the working electrode, a carbon cloth sheet was cut into 1 cm × 2 cm dimensions and washed using ultrasonic cleaning with deionized water and acetone. Then, the electrodes were dried in an oven at 45° C. Further, the catalyst's ink was prepared using 3 mg of each catalyst and was uniformly dispersed in ethanol (70 μL) and Nafion solution (30 μL) using the ultrasonic treatment for 30 minutes. The 100 μl of catalyst ink was drop-cast on a 1×1 cm<sup>2</sup> area of C cloth.

**Cyclic voltammetry (CV) and linear sweep voltammetry (LSV).** The CV and LSV studies were done in the potential range of 0 to -1.5 V (vs Ag/AgCl) with a scan rate of 10 mV s<sup>-1</sup>. The current density was normalized using the geometrical surface area. The recorded potential was converted to a reversible hydrogen electrode (RHE) by using the following equation:

$$E(\text{RHE}) = E(\text{vs. Ag/AgCl}) + E^{\circ}(\text{Ag/AgCl}) + 0.0591 \times \text{pH} \quad \text{Eq. S1}$$

**Electrochemical nitrate reduction reaction (eNO<sub>3</sub>RR).** The eNO<sub>3</sub>RR was carried out in 20 mL of various electrolytes, and potassium nitrate (0.1 M) served as the source of nitrate. An electrochemical cell containing a three-electrode set-up with a catalyst deposited on carbon cloth as a working electrode, a graphite rod as a counter electrode, and Ag/AgCl (3.5 M KCl aq) as a reference electrode was used. Before each electrochemical run, the electrolyte was purged with argon for 10 minutes to eliminate dissolved oxygen. During the chronoamperometric measurements, the solution was stirred for 1 hour at a rate of 500 rpm. After electrolysis, the concentration of [NO<sub>2</sub>]<sup>-</sup> and NH<sub>3</sub> was detected by the Griess and indophenol blue methods, respectively. Calibration curves, made with standard [NO<sub>2</sub>]<sup>-</sup> and NH<sub>3</sub> solutions, were used for quantification (Figure S8, S9). Also, the charge-transfer coefficient ( $\alpha$ ) was obtained from the temperature dependence of the Tafel slope according to:

$$\eta = \frac{2.303RT}{\alpha nF} \log \frac{j}{j_0} \quad \text{Eq. S2}$$

**Quantification of ammonia.** The detection and quantification of ammonia were executed using the Indophenol Blue method after electrolysis. At first, the calibration curve was made using NH<sub>4</sub>Cl solutions as a standard of different concentrations varying from 0 to 249.34 μM. For the calibration curve, in 5 mL of the NH<sub>4</sub>Cl solution of a respective concentration, 2 mL of 10 mg/ mL of phenol solution (in ethanol) was added, followed by the addition of 200 μL

of 0.5 wt% of sodium nitroferricyanide (in water). Later, the pH of the solution was adjusted above 10 using 1 M NaOH. Finally, 100  $\mu\text{L}$  of NaOCl was added to the solution mixture. The resulting solution was incubated for 2 h in the dark, and after that UV-vis spectra were recorded for different concentrations of  $\text{NH}_4\text{Cl}$ . The characteristic band at 640 nm was observed for indophenol blue dye. Similarly, produced  $\text{NH}_3$  was quantified in different electrolytes after chronoamperometry scans at corresponding current densities for 1 h, using the respective electrolyte as analyte.

**Quantification of nitrite.** The detection and quantification of nitrite were executed using the Griess method after electrolysis. Initially, the calibration curve was made using different concentrations of potassium nitrite ( $\text{KNO}_2$ ): 0 to 290  $\mu\text{M}$ . Before the calibration curve, sulfanilamide and N-(1-naphthyl) ethylenediamine dihydrochloride (NED) solutions were prepared by dissolving 0.25g of sulfanilamide into 25 mL of a 2.0 M HCl solution, and 20.0 mg of NED in 20.0 mL of deionized water, respectively. Then for the calibration curve, in 5 mL of  $\text{KNO}_2$  solution of a respective concentration, 100  $\mu\text{L}$  of sulfanilamide, and 100  $\mu\text{L}$  of NED were added. The resulting solution was kept for 30 minutes under standard conditions and after that UV-vis spectra were recorded for different concentrations of  $\text{KNO}_2$ . The characteristic band at 540 nm was observed for diazo dye. Similarly, produced  $[\text{NO}_2]^-$  was quantified in different electrolytes after chronopotentiometry scans at corresponding current densities for 1 h, using the respective electrolyte as analyte.

**Rotating Disk Electrode (RDE) Experiment.** RDE experiments were performed in acetate buffer (0.2 M, pH 2.8) and 0.1 M  $\text{KNO}_3$ . The electrochemical rate constants ( $k$ ) and kinetic current ( $i_k$ ) were obtained using a Koutecky–Levich (K–L) plot using the following equations:

$$\frac{1}{i_c} = \frac{1}{i_k} + \left[ \frac{1}{0.62 nF AD^{2/3} \nu^{-1/6} C_0} \right] \omega^{-1/2} \quad \text{Eq. S3}$$

$$i_k = nFAkc_0 \quad \text{Eq. S4}$$

where  $n$  is the number of transferred electrons for nitrate to ammonia;  $F$  is the Faraday constant ( $96485\text{C mol}^{-1}$ );  $A$  is the surface area of the electrode (5 mm diameter);  $D$  is the diffusion coefficient of  $[\text{NO}_3]^-$  ( $2 \times 10^{-5} \text{ cm}^2 \text{ s}^{-1}$ );  $\nu$  is the kinematic viscosity ( $0.0088 \text{ cm}^2 \text{ s}^{-1}$ );  $i_c$  is the current at a defined working potential (V vs RHE);  $i_k$  is the kinetic current;  $C_0$  is the initial concentration of electrolyte and,  $k$  is the electrochemical rate constant. Steady-state voltammograms were recorded at different rotating rates ( $\omega$ ) (rotating rates: 928.57, 1342.9, 1757.1, 2171.4, and 2585.7 rpm) using the cell set-up mentioned above and  $\alpha\text{-SnWO}_4$  deposited on the working electrode.

**e $\text{NO}_3\text{RR}$  in tapwater.** The e $\text{NO}_3\text{RR}$  in tapwater was carried out in 20 mL of acetate buffer (0.2 M, pH = 2.8) prepared in tap water, keeping the other conditions the same. The tapwater was collected from the laboratory in IIT Delhi. The concentration of  $[\text{NO}_3]^-$  was detected by the previously reported method.<sup>1</sup> Calibration curves, made with standard  $[\text{NO}_3]^-$ , were used for

quantification (Figure S18). In order to check the consistency of nitrate ions present in it, the UV-vis spectra were measured on different days, giving the variation of  $\pm 0.01 \text{ mg L}^{-1}$ .

**Quantification of ammonia by  $^1\text{H}$  Nuclear Magnetic Resonance (NMR).**  $^{14}\text{NH}_4^+$  were quantified by  $^1\text{H}$  nuclear magnetic resonance (NMR) spectroscopy using 500 MHz JEOL NMR. The samples for NMR were prepared using 300  $\mu\text{L}$  of the electrolyte after the chronopotentiometry experiments. The pH of the electrolyte was adjusted to 3 using 1 M  $\text{H}_2\text{SO}_4$ . Further, 100  $\mu\text{L}$  of maleic acid and 100  $\mu\text{L}$  of  $\text{D}_2\text{O}$  were used as internal standard and as solvent.

**Faradaic efficiencies.** The Faradaic efficiencies of  $\text{NH}_3$  and  $[\text{NO}_2]^-$  produced through  $\text{eNO}_3\text{RR}$  were calculated from the equation below:

$$\text{Faradic Efficiency (\% FE)} = \frac{n \times F \times C \times V}{Q} \times 100 \quad \text{Eq. S5}$$

where  $F$  is the Faradaic constant ( $96485 \text{ C mol}^{-1}$ ),  $C$  is the concentration of  $\text{NH}_3/[\text{NO}_2]^-$ ,  $V$  is the electrolyte volume, and  $Q$  is the total charge passing the electrode.

**Temperature-dependent  $\text{NO}_3\text{RR}$ .** A temperature-dependent electrochemical study was conducted by varying the temperature from 20 to 40  $^\circ\text{C}$ . The cell temperature was monitored using a thermometer immersed in the electrolyte, and temperature control was maintained using an oil bath. The activation energy ( $E_a$ ) was determined from the slope of the Arrhenius plot of  $\ln j_0$  versus  $1/T$ , based on the Arrhenius equation:

$$\frac{d(\ln j_0)}{d\left(\frac{1}{T}\right)} = \frac{E_a}{R} \quad \text{Eq. S6}$$

where  $E_a$  is the activation energy,  $R$  is the gas constant, and  $T$  is the absolute temperature. where  $F$  is the Faraday constant and  $n$  is the number of electrons involved in the rate-determining step.

**In-situ IR measurements.** The intermediates and products formed during  $\text{eNO}_3\text{RR}$  were monitored using in situ infrared (IR) spectroscopy. Measurements were performed with a Mettler Toledo React IR 700 (SN: C049640472), equipped with a TEMCT detector and a DiComp (diamond) probe connected via a 9.5 mm  $\times$  2 m AgX fiber interface. The IR probe was directly immersed in the electrochemical cell, which contained a three-electrode setup: a working electrode ( $\alpha\text{-SnWO}_4$  loaded on C cloth), a reference electrode (Ag/AgCl in aqueous solution), and a counter electrode (graphite rod). The electrolyte consisted of a 0.2 M acetate buffer (pH 2.8) with 0.1 M  $\text{KNO}_3$ . IR spectra were recorded in real time during chronoamperometric experiments conducted at various applied potentials ( $-0.05 \text{ V}$  to  $-0.45 \text{ V}$  vs RHE), and the solution was stirred at a rate of 500 rpm. All electrochemical measurements were carried out using a CHI 1205C potentiostat.

**In-situ EPR measurements.** EPR spectra of the liquid samples were recorded in a Bruker EPR spectrometer (Biospin, EMXmicro A200) at a room temperature setup. In-situ EPR spectra were collected after 10 minutes of electrolysis at  $-0.6 \text{ V}$  vs. RHE in the presence of DMPO in

both cases: with electrolysis in the absence of nitrate, and with electrolysis in the presence of nitrate.

**Photoelectrocatalytic Nitrate Reduction.** Photoelectrocatalytic (PEC) NO<sub>3</sub>RR experiments were carried out in a standard three-electrode PEC cell. The working electrode was prepared by drop-casting 10  $\mu$ L of catalyst ink (1mg catalyst dispersed in 70  $\mu$ L ethanol and 30  $\mu$ L nafion) onto indium tin oxide (ITO) glass (geometric area: 1cm<sup>2</sup>) and drying at room temperature. A graphite rod was used as a counter electrode, and Ag/AgCl (3.5 N KCl) was used as a reference electrode. The PEC measurements were performed in an acetate buffer (0.2 M, pH 2.8) as electrolyte containing 0.1 M KNO<sub>3</sub>. Before measurements, the electrolyte was purged with Ar for 10 min to remove dissolved oxygen. Illumination was provided using a 427 nm LED light source at room temperature, placed at a fixed distance of 1 cm from the working electrode.

**Calculation of Incident photon to current efficiency (IPCE):** The IPCE was calculated according to:

$$\text{IPCE} = \frac{1240 \times I_{\lambda}}{\lambda \times P_{\lambda}} \quad \text{Eq. S7}$$

where  $I_{\lambda}$  is the photocurrent in mA cm<sup>-2</sup>,  $P_{\lambda}$  is the light power intensity in mW cm<sup>-2</sup>, and  $\lambda$  is the wavelength in nm.

**Table S1.** Comparison of eNO<sub>3</sub>RR catalyzed by  $\alpha$ -SnWO<sub>4</sub> with some reported tungstates and Sn-based electrocatalysts.

| Catalyst                                             | Process             | Potential (vs RHE) | Electrolyte                            | FE <sub>NH<sub>3</sub></sub> (%) | Reference |
|------------------------------------------------------|---------------------|--------------------|----------------------------------------|----------------------------------|-----------|
| $\alpha$ -SnWO <sub>4</sub>                          | eNO <sub>3</sub> RR | -0.2 V             | 0.2 M AB <sup>#</sup>                  | 90(±4)                           | This work |
| ZnWO <sub>4</sub>                                    | eNO <sub>3</sub> RR | -0.2 V             | 0.2 M AB <sup>#</sup>                  | 38(±2)                           | This work |
| NiWO <sub>4</sub>                                    | eNO <sub>2</sub> RR | -0.4 V             | 0.1 M NaOH                             | 97.6                             | 2         |
| Ru/CoWO <sub>4</sub>                                 | eNO <sub>3</sub> RR | -0.7 V             | 0.1 M KOH                              | 95.94                            | 3         |
| CoWO <sub>4</sub> /CoOOH                             | eNO <sub>3</sub> RR | -0.276 V           | 1 M KOH                                | 97.54                            | 4         |
| Sn/C                                                 | eN <sub>2</sub> RR  | -0.4 V             | 0.1 M Na <sub>2</sub> SO <sub>4</sub>  | 22.76                            | 5         |
| CoSn-CNF                                             | eNO <sub>3</sub> RR | -0.6 V             | 1.0 M KOH                              | 81.5                             | 6         |
| Ni-Sn alloy                                          | eN <sub>2</sub> RR  | -0.4 V             | 0.10 M Na <sub>2</sub> SO <sub>4</sub> | 38.00                            | 7         |
| Co <sub>3</sub> O <sub>4</sub> -SnO <sub>2</sub> /CC | eNO <sub>3</sub> RR | -0.6 V             | 0.1 M NaOH                             | 98.6                             | 8         |
| Sn-FeS <sub>2</sub>                                  | eNO <sub>3</sub> RR | -0.5 V             | 1 M KOH                                | 96.7                             | 9         |
| Fe <sub>x</sub> Sn <sub>1-x</sub> S                  | eNO <sub>3</sub> RR | -0.3               | 0.1 M AB <sup>#</sup>                  | 85                               | 10        |
| Mo <sub>x</sub> @SnO <sub>2</sub>                    | eNO <sub>3</sub> RR | -0.2 V             | 0.05 M AB <sup>#</sup>                 | 94                               | 11        |

<sup>#</sup>Acetate buffer of pH 3

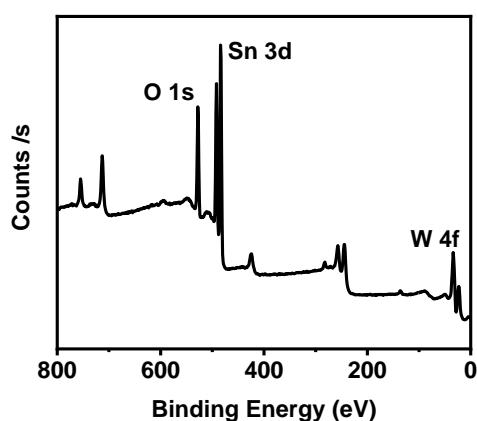

**Figure S1.** XPS survey spectrum of the as-synthesized  $\alpha$ -SnWO<sub>4</sub>, confirming the presence of Sn, W, and O.

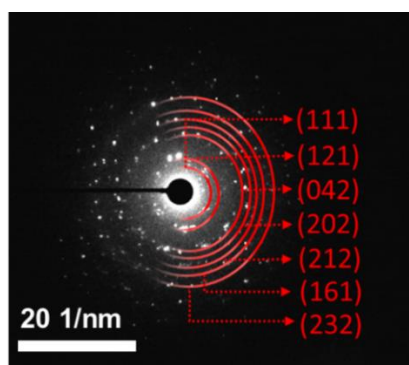

**Figure S2.** Selected area electron diffraction (SAED) pattern of  $\alpha$ -SnWO<sub>4</sub>.

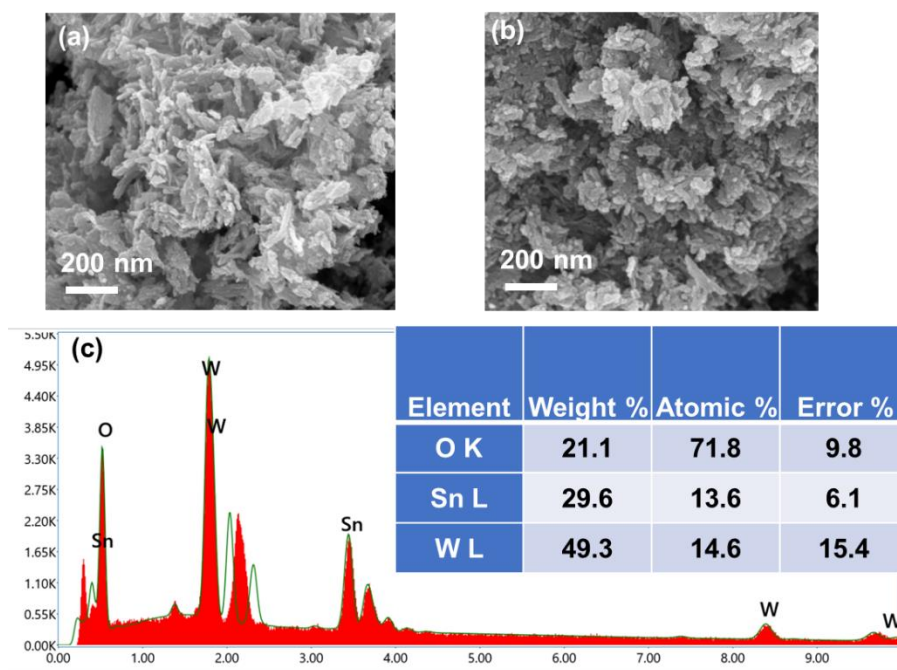

**Figure S3.** (a-b) FESEM image of the as-synthesised  $\alpha$ -SnWO<sub>4</sub>. (c) Atomic percentage of Sn, W, and O elements of the area presented in figure 1g.

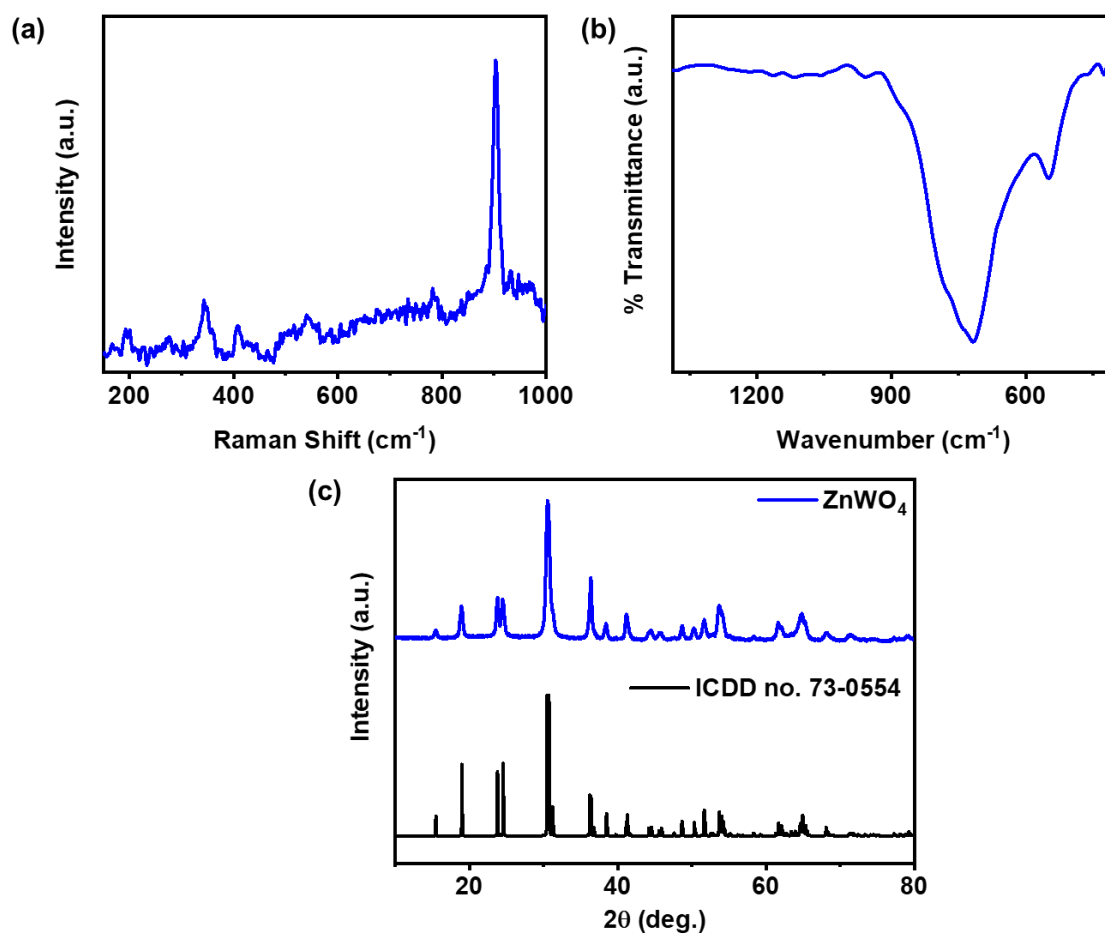

**Figure S4.** (a) Raman, (b) IR, and PXRD pattern along with ICDD data of ZnWO<sub>4</sub>.

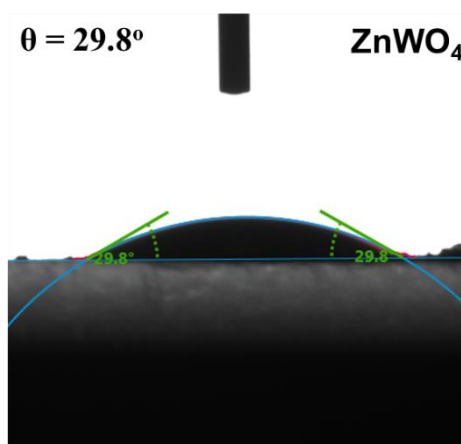

**Figure S5.** Wettability test through contact angle measurement performed with ZnWO<sub>4</sub>.

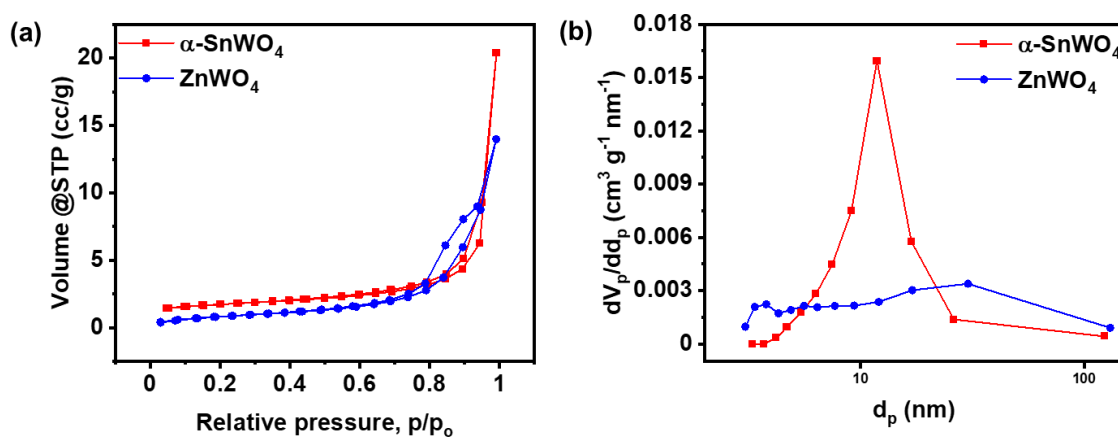

**Figure S6.** N<sub>2</sub> adsorption–desorption isotherms obtained for the powder samples;  $\alpha$ -SnWO<sub>4</sub> (red), and ZnWO<sub>4</sub> (blue) and the (b) the pore size distribution obtained from the BET study.

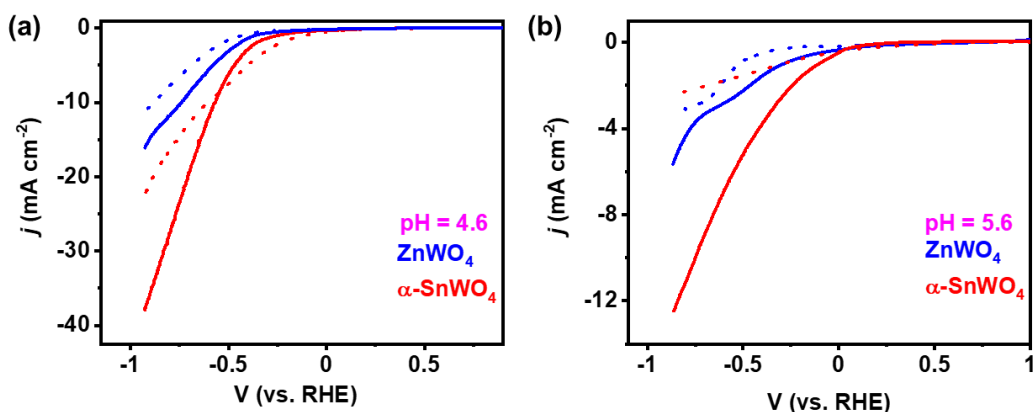

**Figure S7.** Linear sweep voltammograms recorded with  $\text{ZnWO}_4$  and  $\alpha\text{-SnWO}_4$  using 0.2 M acetate buffer of (a) pH 4.6, and (b) pH 5.6 without (dotted lines) and with (solid lines) 0.1 M  $\text{KNO}_3$  using the three-electrode set up (WE: catalyst loaded on CC, RE: Ag/AgCl (aq.) and CE: graphite rod).

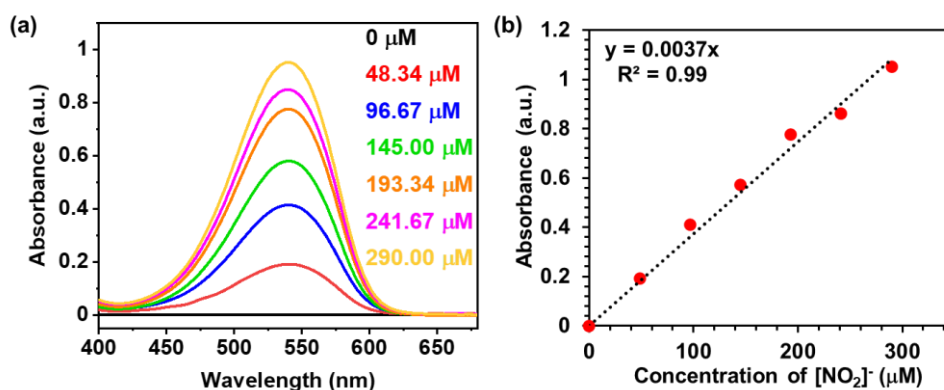

**Figure S8.** Calibration curve for the detection of  $[\text{NO}_2^-]$  ion through the reported Griess method (see experimental): (a) UV-Vis spectra of standard solution with different concentrations (0 - 290  $\mu\text{M}$  of  $[\text{NO}_2^-]$ ), (b) corresponding plot of absorbance at 540 nm versus different concentrations (0 - 290  $\mu\text{M}$ ).

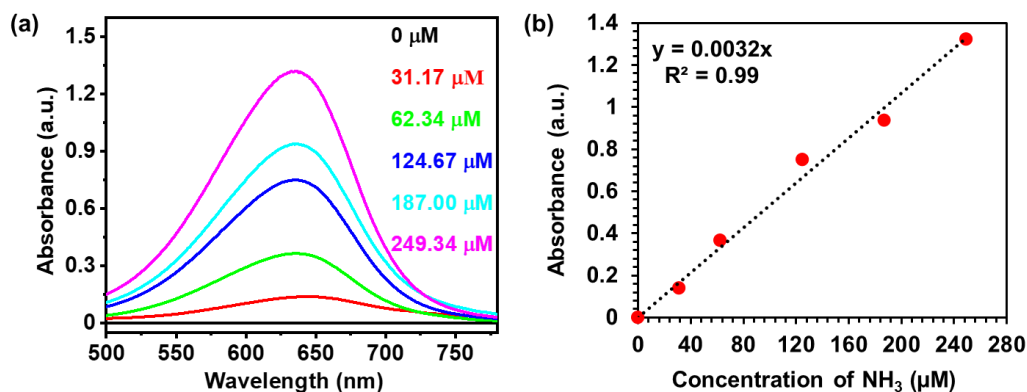

**Figure S9.** Calibration curve for the detection of NH<sub>3</sub> ion through the reported Indo-phenol blue method (see experimental); (a) UV-vis spectra of standard solution with different concentrations (0 - 249.34 μM), (b) corresponding plot of absorbance at 640 nm versus different concentrations (0 - 249.34 μM).

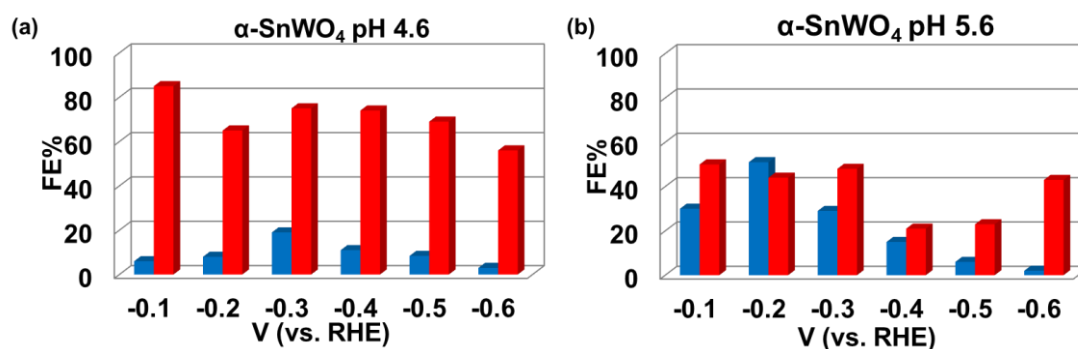

**Figure S10.** FEs for NH<sub>3</sub> (red) and [NO<sub>2</sub>]<sup>-</sup> (blue) production during 1 h chronoamperometric (CA) with α-SnWO<sub>4</sub> using 0.1 M KNO<sub>3</sub> in acetate buffer (0.2 M) at different applied potentials for pH (a) 4.6, and (b) 5.6.

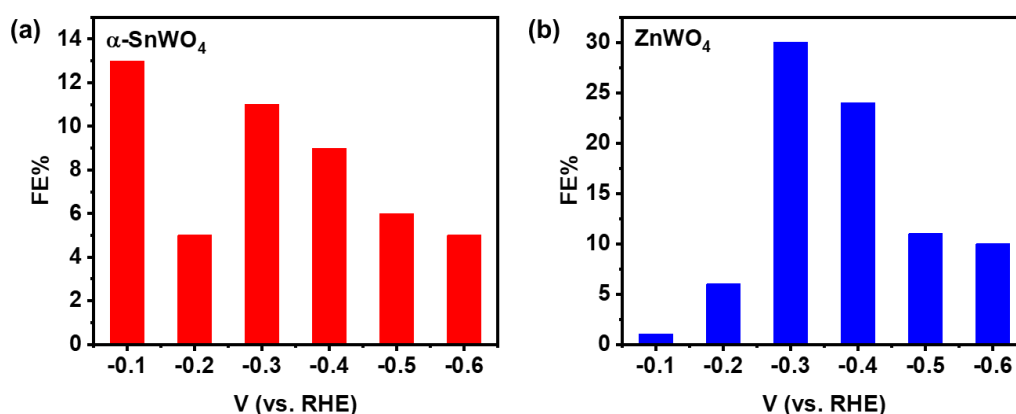

**Figure S11.** FEs for [NO<sub>2</sub>]<sup>-</sup> production during 1 h chronoamperometric (CA) with (a) α-SnWO<sub>4</sub> and (b) ZnWO<sub>4</sub> using 0.1 M KNO<sub>3</sub> in acetate buffer (0.2 M) at different applied potentials for pH 2.8.

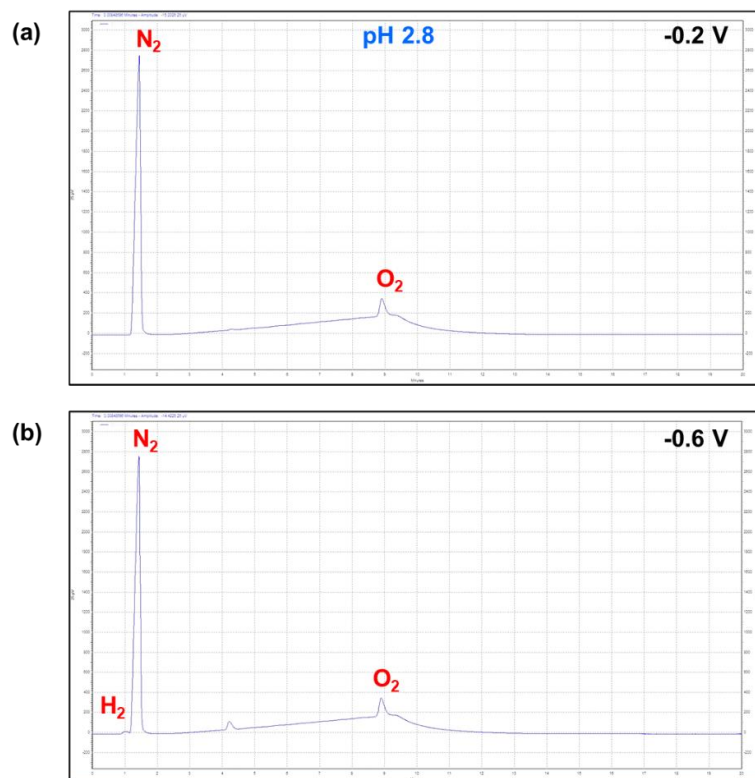

**Figure S12.** GC (TCD) chromatogram obtained for the electrochemical eNO<sub>3</sub>RR performed with  $\alpha$ -SnWO<sub>4</sub> in acetate buffer (0.2 M, pH 2.8) at (a) -0.2 V (b) -0.6 V vs. RHE in a closed container using the three-electrode setup (WE:  $\alpha$ -SnWO<sub>4</sub> loaded on CC, RE: Ag/AgCl (aq.), and CE: graphite rod).

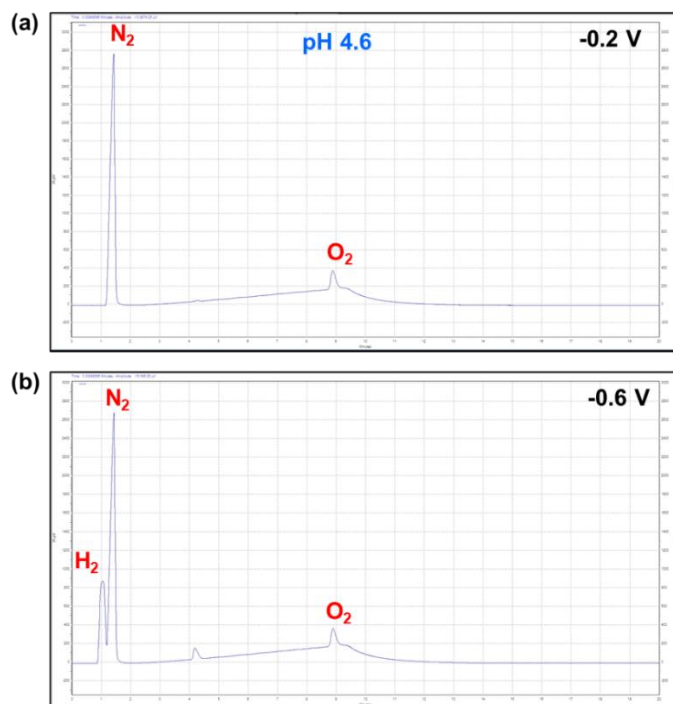

**Figure S13.** GC (TCD) chromatogram obtained for the electrochemical eNO<sub>3</sub>RR performed with  $\alpha$ -SnWO<sub>4</sub> in acetate buffer (0.2 M, pH 4.6) at (a) -0.2 V (b) -0.6 V vs. RHE in a closed container using the three-electrode setup (WE:  $\alpha$ -SnWO<sub>4</sub> loaded on CC, RE: Ag/AgCl (aq.), and CE: graphite rod).

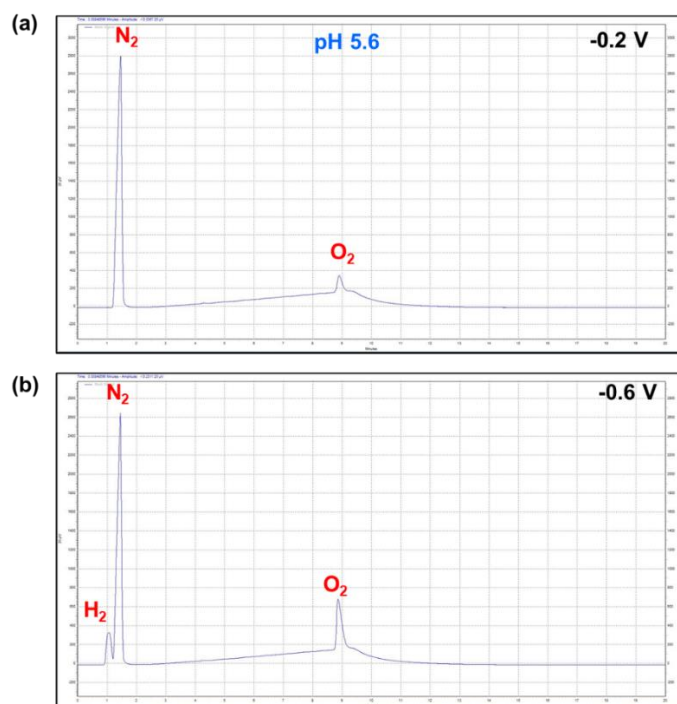

**Figure S14.** GC (TCD) chromatogram obtained for the electrochemical eNO<sub>3</sub>RR performed with  $\alpha$ -SnWO<sub>4</sub> in acetate buffer (0.2 M, pH 5.6) at (a) -0.2 V (b) -0.6 V vs. RHE in a closed container using the three-electrode setup (WE:  $\alpha$ -SnWO<sub>4</sub> loaded on CC, RE: Ag/AgCl (aq.), and CE: graphite rod).

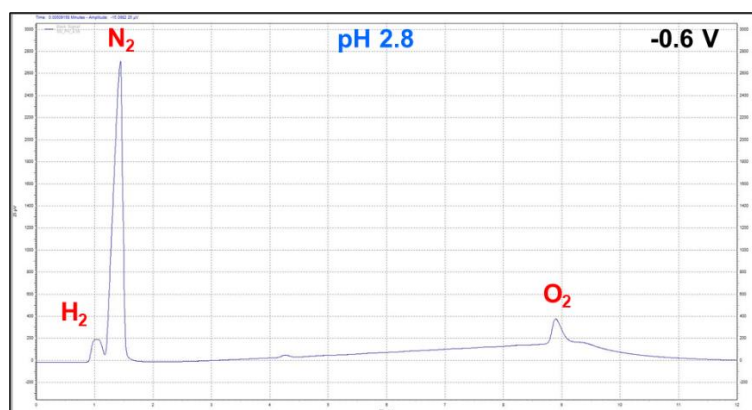

**Figure S15.** GC (TCD) chromatogram obtained for the electrochemical eNO<sub>3</sub>RR performed with ZnWO<sub>4</sub> in acetate buffer (0.2 M, pH 2.8) at -0.6 V vs. RHE in a closed container using the three-electrode setup (WE:  $\alpha$ -SnWO<sub>4</sub> loaded on CC, RE: Ag/AgCl (aq.), and CE: graphite rod).

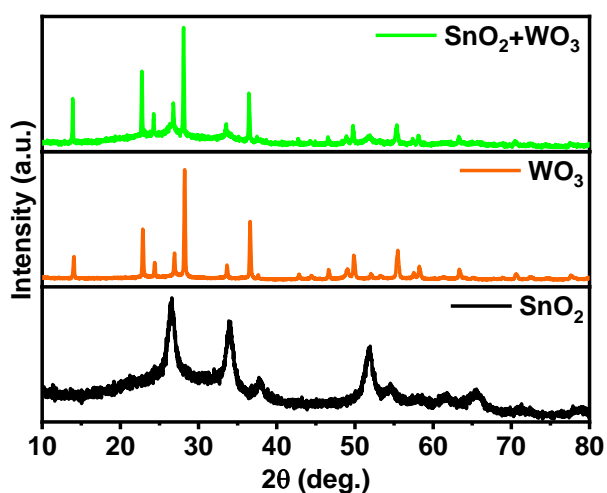

**Figure S16.** PXRD pattern of SnO<sub>2</sub> (black), WO<sub>3</sub> (orange) and physical mixture (1:1 weight ratio) of SnO<sub>2</sub> and WO<sub>3</sub> (green).

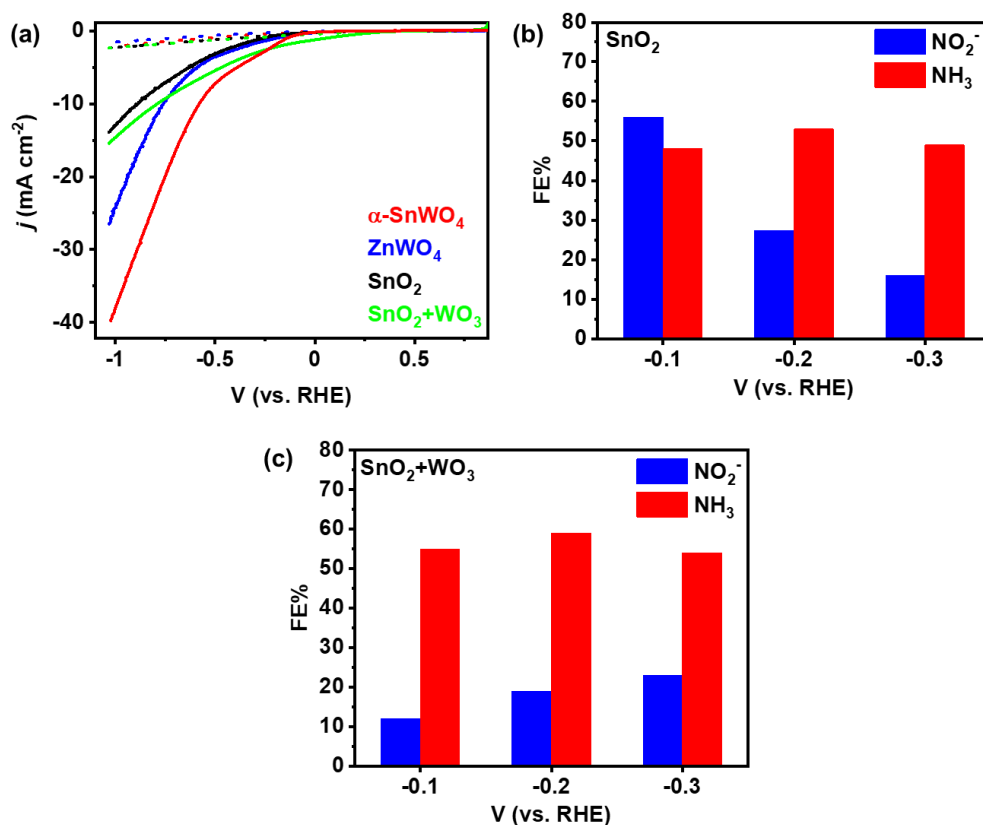

**Figure S17.** (a) Comparison of LSV curves obtained for different materials (SnWO<sub>4</sub>, ZnWO<sub>4</sub>, SnO<sub>2</sub> and a physical mixture of SnO<sub>2</sub>+WO<sub>3</sub>) in acetate buffer (0.2 M, pH 2.8) (dotted lines represent without KNO<sub>3</sub> and solid lines represent with 0.1 M KNO<sub>3</sub>). FEs of [NO<sub>2</sub>]<sup>-</sup> and NH<sub>3</sub> produced during eNO<sub>3</sub>RR with (b) SnO<sub>2</sub>, (c) a physical mixture of SnO<sub>2</sub>+WO<sub>3</sub>.

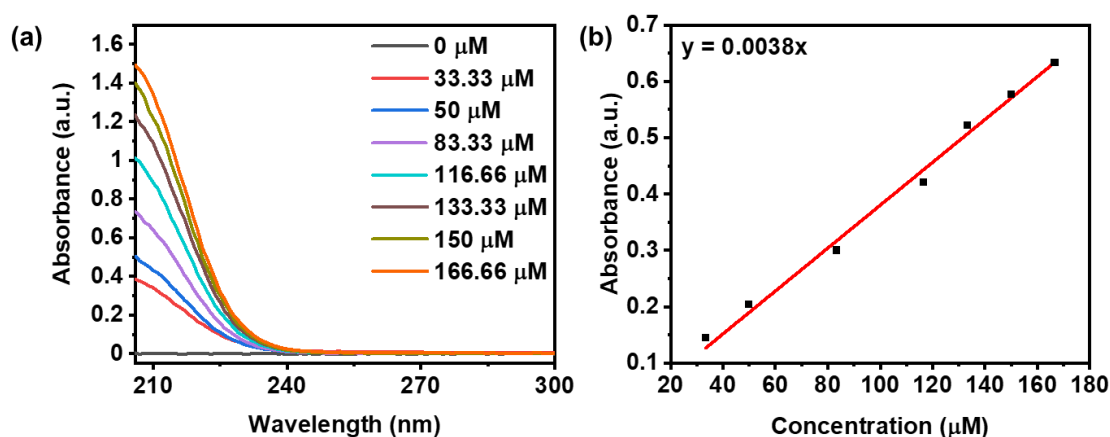

**Figure S18.** Calibration curve for the detection of NO<sub>3</sub><sup>-</sup> ion (see experimental); (a) UV-vis spectra of standard solution with different concentrations (0 - 166.66 μM), (b) corresponding plot of absorbance at 220 nm versus different concentrations (0 - 166.66 μM).

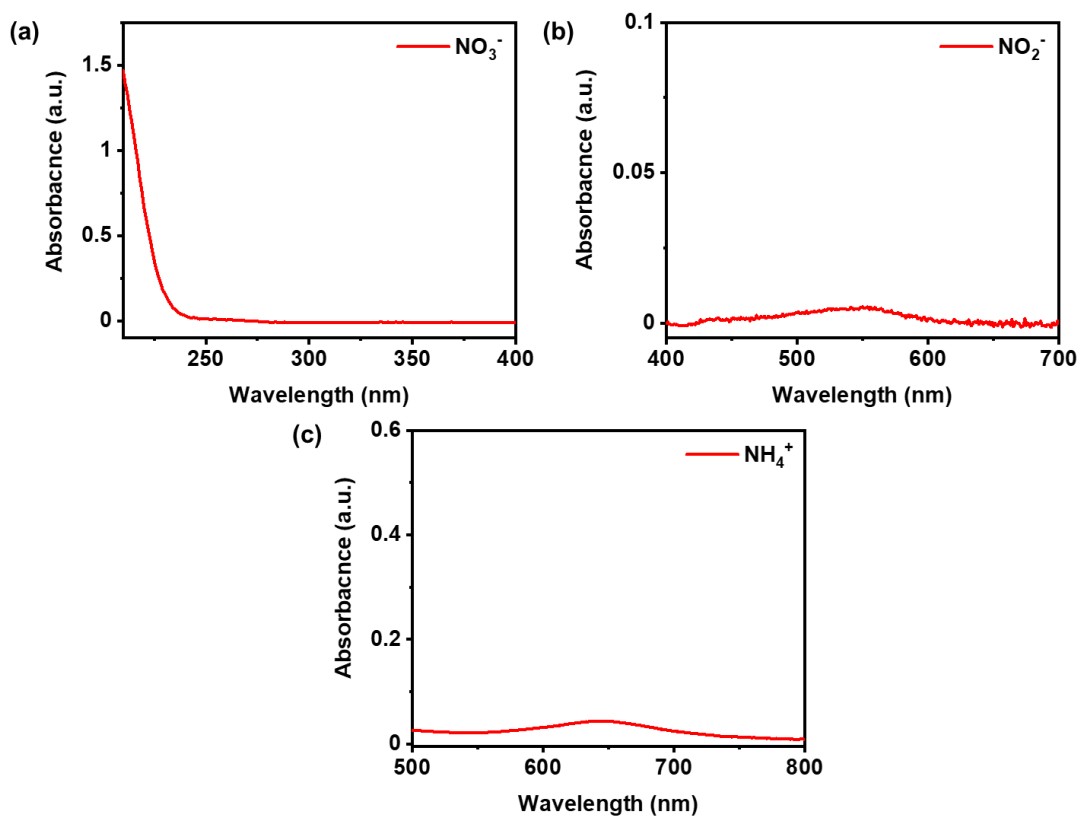

**Figure S19.** UV-vis spectra of tapwater containing ions: (a)  $\text{NO}_3^-$ , (b)  $\text{NO}_2^-$ , and (c)  $\text{NH}_4^+$ .

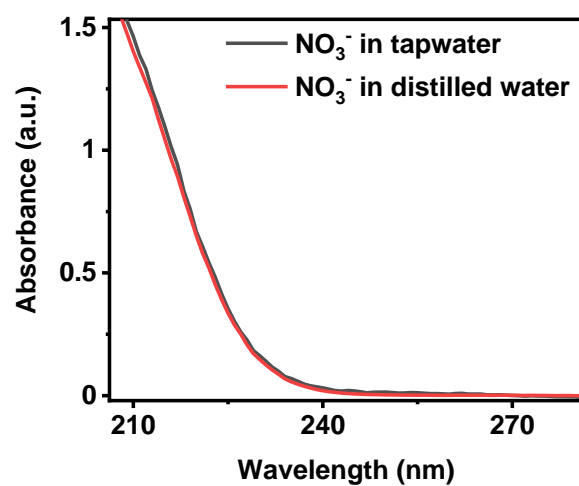

**Figure S20.** Comparison of UV-vis spectra of  $\text{NO}_3^-$  ions present in tapwater (grey curve) and 11.1 mg  $\text{L}^{-1}$  of  $\text{KNO}_3$  added in distilled water (red curve).

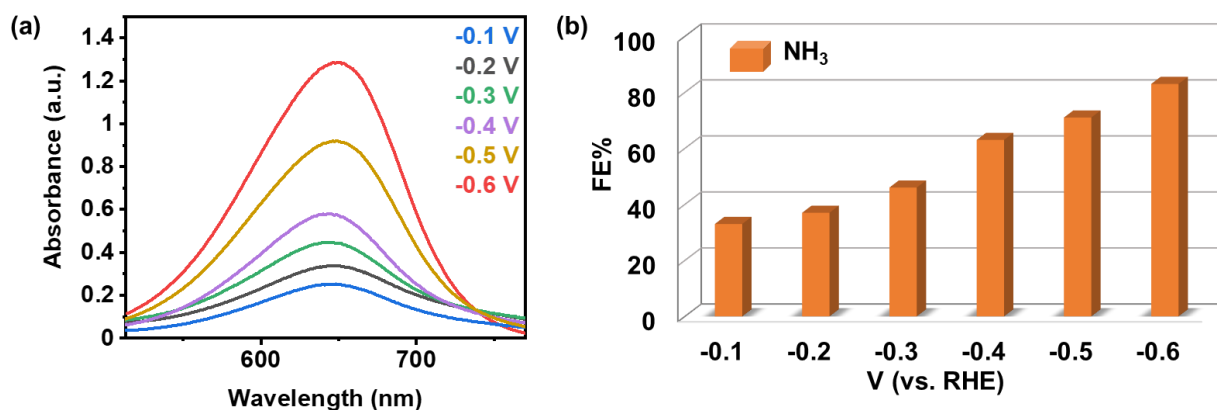

**Figure S21.** (a) UV-Vis spectra, and (b) comparison of FE% of NH<sub>3</sub> obtained after CA at different potentials in acetate buffer made in tapwater (0.2 M, pH 3).

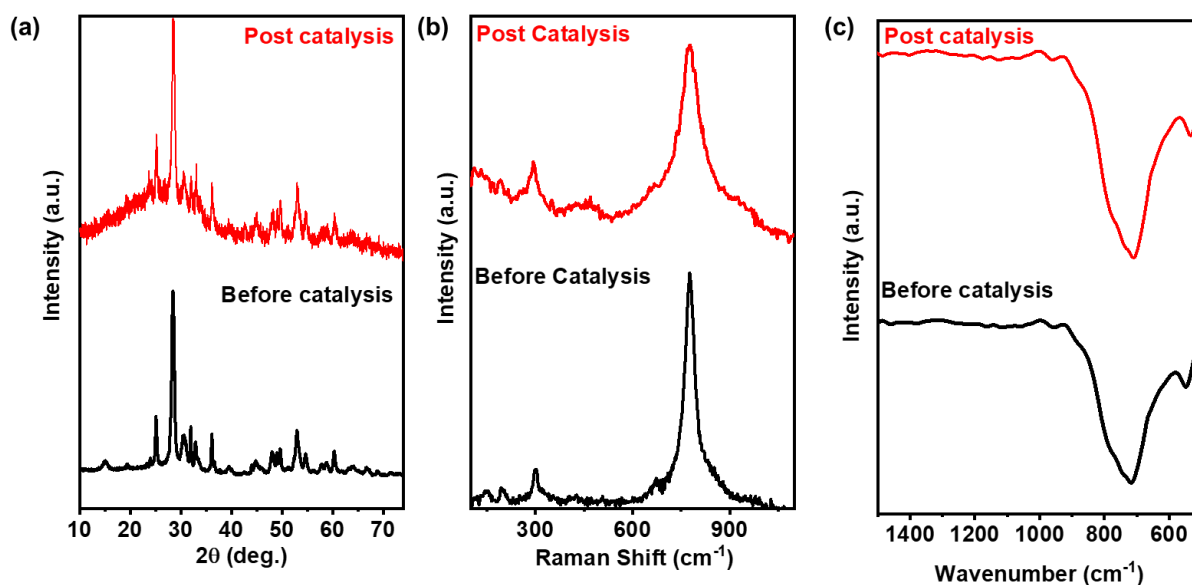

**Figure S22.** (a) PXRD pattern, (b) Raman spectra, and (c) FTIR spectra of used  $\alpha$ -SnWO<sub>4</sub>/CC electrode or the extracted material from the electrode after eNO<sub>3</sub>RR. (Black curves are the spectra of as-synthesized materials).

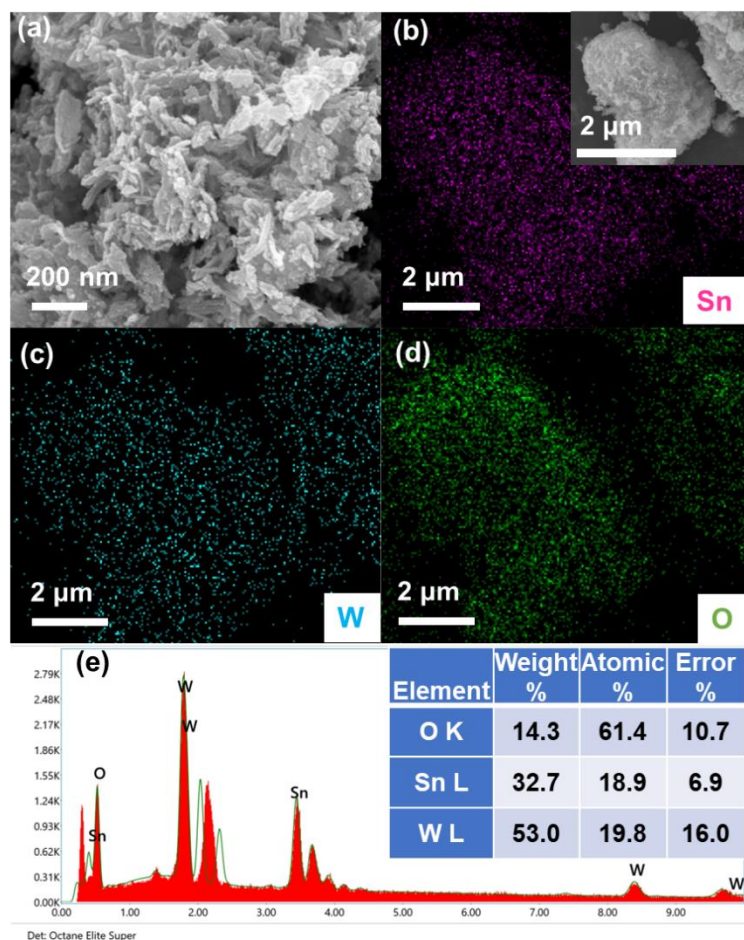

**Figure S23.** (a) FESEM image of  $\alpha$ -SnWO<sub>4</sub>, (b-d) FESEM–EDX elemental mapping of corresponding elements, such as (b) Sn, (c) W, and (d) O elements present on area (b: inset). (e) atomic percentage of Sn, W, and O elements after eNO<sub>3</sub>RR.

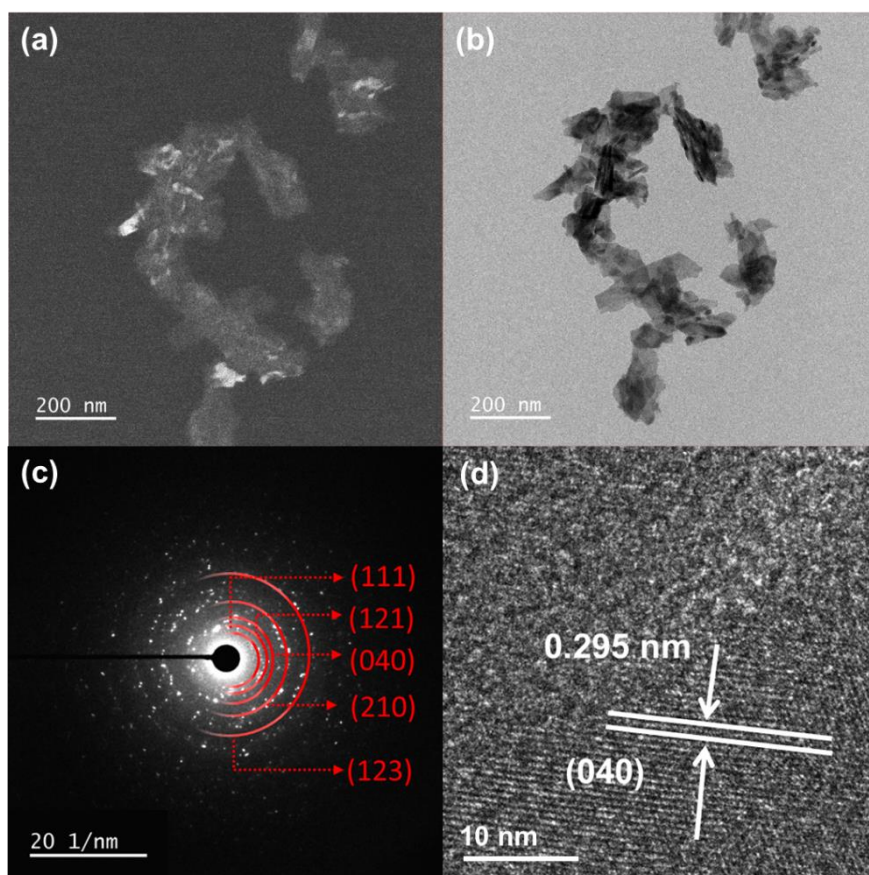

**Figure S24.** (a) Brightfield TEM image of  $\alpha$ -SnWO<sub>4</sub>. (b) Darkfield TEM image obtained by selectively illuminating the particles with (040) facets, (c) selected area electron diffraction (SAED) pattern of the particles of  $\alpha$ -SnWO<sub>4</sub>, and (d) HRTEM image of  $\alpha$ -SnWO<sub>4</sub> with lattice fringes for (040) planes with 0.295 nm interplanar distance after eNO<sub>3</sub>RR.

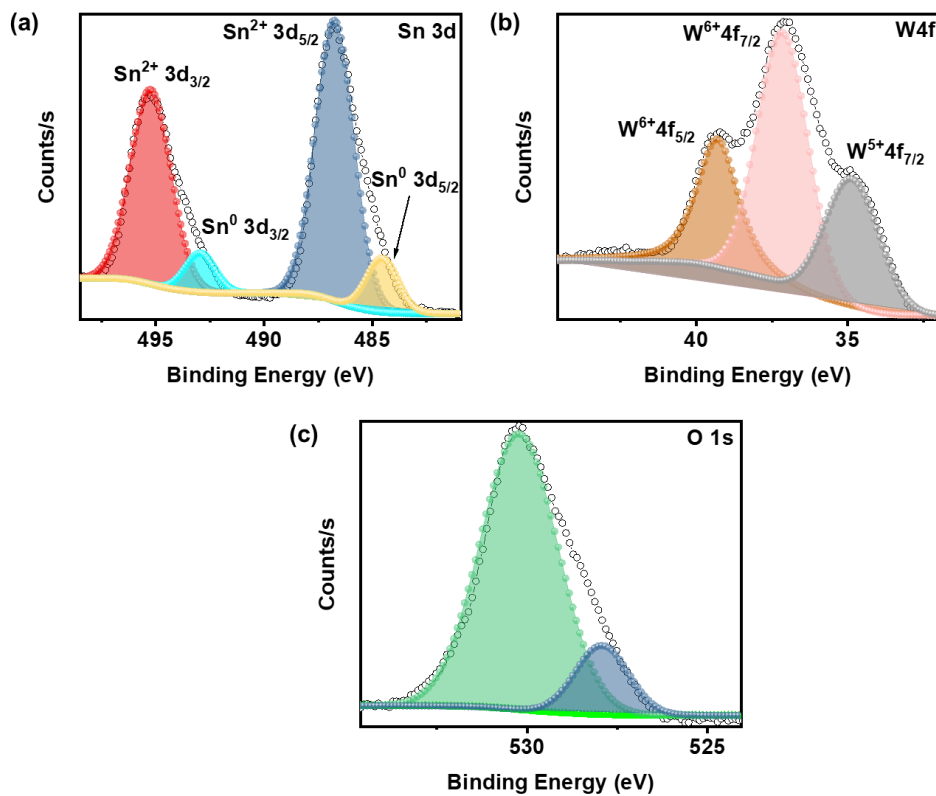

**Figure S25.** Core-level Sn 3d, W 4f and O 1s XPS spectra recorded with the material isolated from the used  $\alpha$ -SnWO<sub>4</sub>/CC electrode after eNO<sub>3</sub>RR.

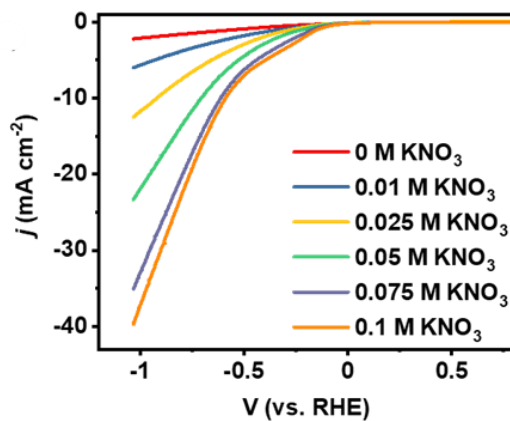

**Figure S26.** LSV curves recorded in different concentrations of KNO<sub>3</sub> (0.01–0.1 M) with  $\alpha$ -SnWO<sub>4</sub> as the electrocatalyst.

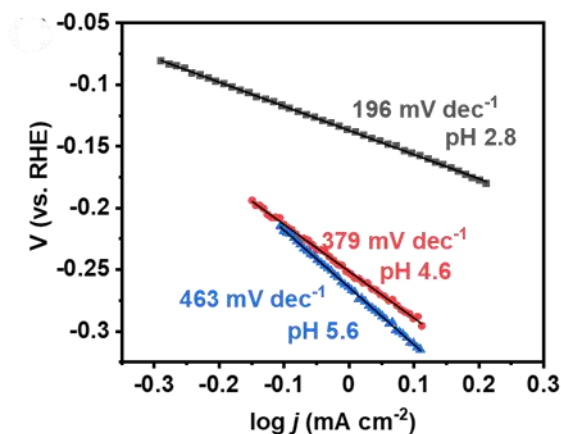

**Figure S27.** Tafel slopes obtained from the LSV scans recorded with  $\alpha$ -SnWO<sub>4</sub>/CC electrode in the acetate buffer of various pH (2.8, 4.6, and 5.6).

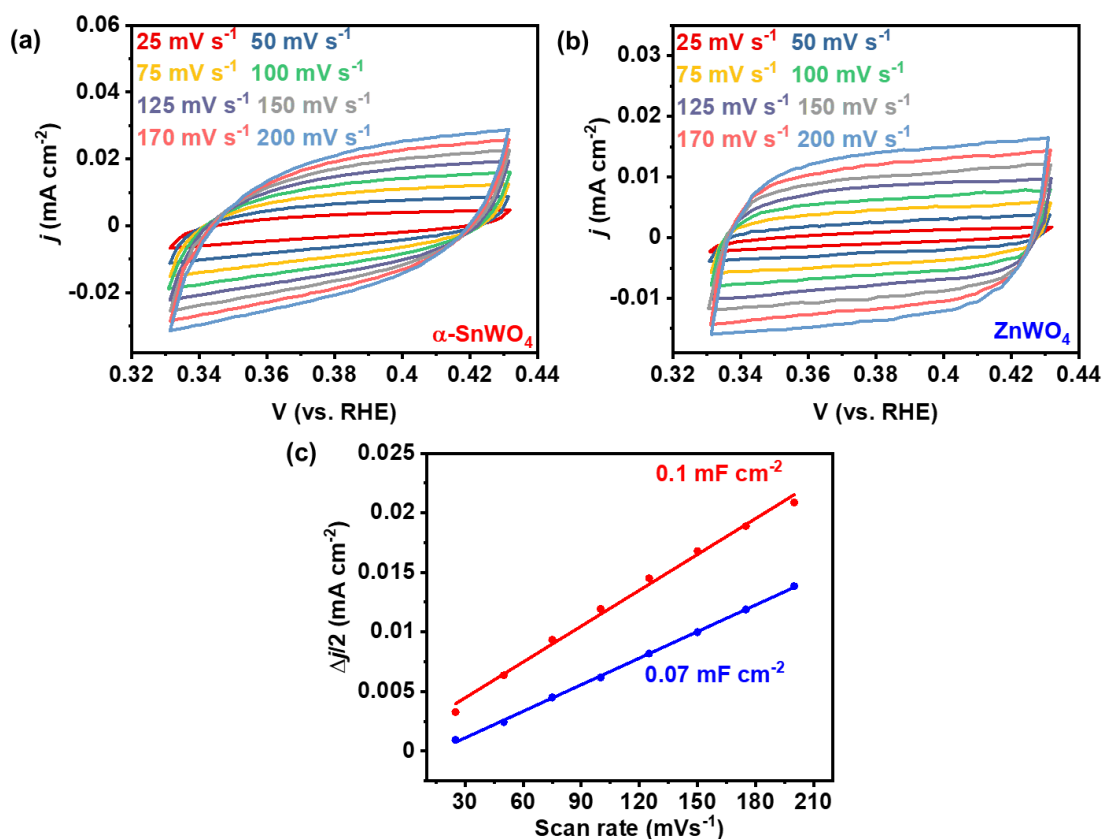

**Figure S28.** Cyclic voltammograms recorded with (a)  $\alpha$ -SnWO<sub>4</sub> and (b) ZnWO<sub>4</sub> (in the non-Faradic region at different scan rates (25 mV s<sup>-1</sup> to 200 mV s<sup>-1</sup>) in acetate buffer (pH 3, 0.2 M) using the three-electrode set up (WE: catalyst loaded on C cloth RE: Ag/AgCl (aq.) and CE: graphite rod). (c) Comparison of  $C_{dl}$  for  $\alpha$ -SnWO<sub>4</sub> (red) and ZnWO<sub>4</sub> (blue).

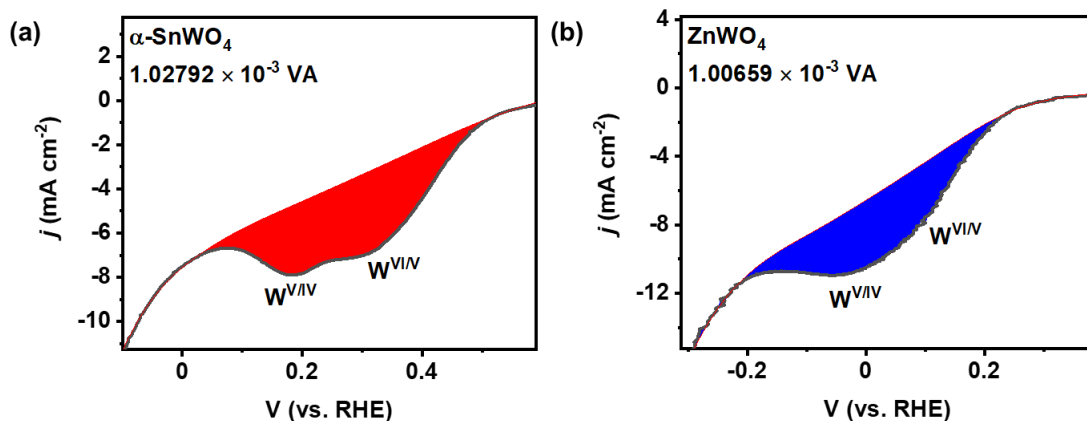

**Figure S29.** The redox region from the CV cycle (Figure 2b) showing the surface area for the peaks corresponding to the reduction of  $W^{VI}$ .

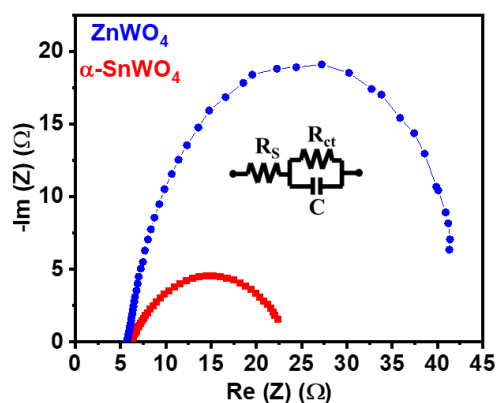

**Figure S30.** Nyquist plots (from the impedance study) obtained for  $ZnWO_4$  and  $\alpha-SnWO_4$  in acetate buffer (0.2 M, pH 2.8) at -0.6 V vs. RHE (inset: equivalent circuit fitting).

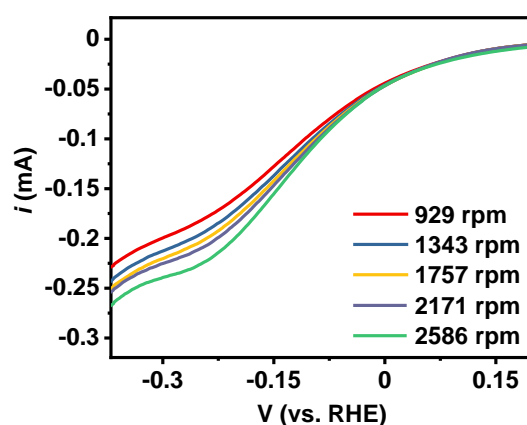

**Figure S31.** Rotating rate-dependent LSV curves (disc current) with  $\alpha-SnWO_4$  deposited on the disk of the RDE working electrode.

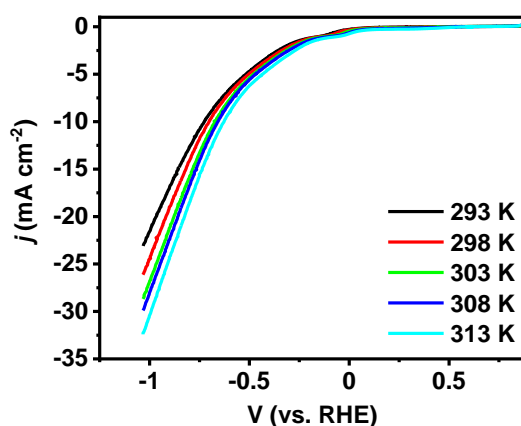

**Figure S32.** Linear sweep voltammograms recorded at different temperatures (293 K to 313 K) with  $\alpha$ -SnWO<sub>4</sub>/CC electrode under the above mentioned eNO<sub>3</sub>RR conditions.

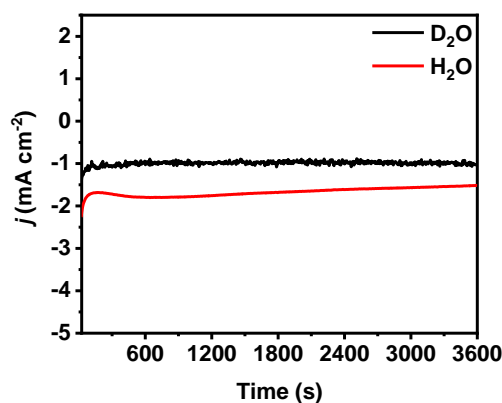

**Figure S33.** Chronoamperometry (CA) studies carried out with  $\alpha$ -SnWO<sub>4</sub> using H<sub>2</sub>O, and D<sub>2</sub>O as an electrolyte solvent to make acetate buffer (0.2 M, pH 2.8) with 0.1 M KNO<sub>3</sub> under the three-electrode setup (WE:  $\alpha$ -SnWO<sub>4</sub> loaded on C cloth RE: Ag/AgCl (aq.) and CE: graphite rod).

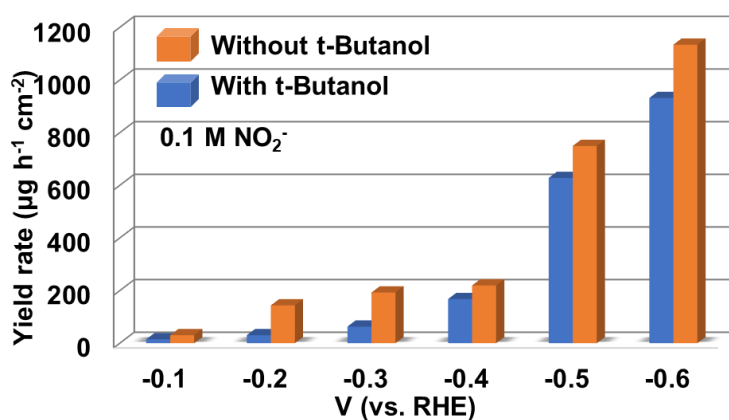

**Figure S34.** Yield rate for NH<sub>3</sub> produced during 1 h chronoamperometric (CA) with  $\alpha$ -SnWO<sub>4</sub> using 0.1 M NO<sub>2</sub><sup>-</sup> in acetate buffer (0.2 M, pH 2.8) at different applied potentials in absence of butanol (orange) and in presence of butanol (blue).

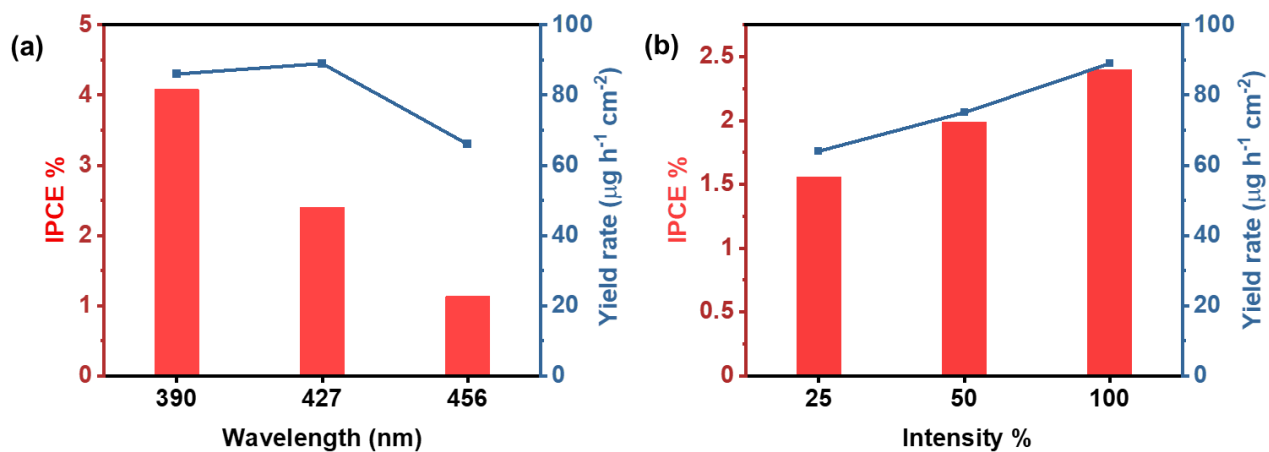

**Figure S35.** (a) Comparison of IPCE% and yield rate of  $\text{NH}_3$  for  $\alpha\text{-SnWO}_4$  at 390, 427, and 456 nm wavelength. (b) Comparison of IPCE% and yield rate of  $\text{NH}_3$  for  $\alpha\text{-SnWO}_4$  at 427 nm ( $137 \text{ mW cm}^{-2}$ ) with different intensities of the power density (25%, 50% and 100%).

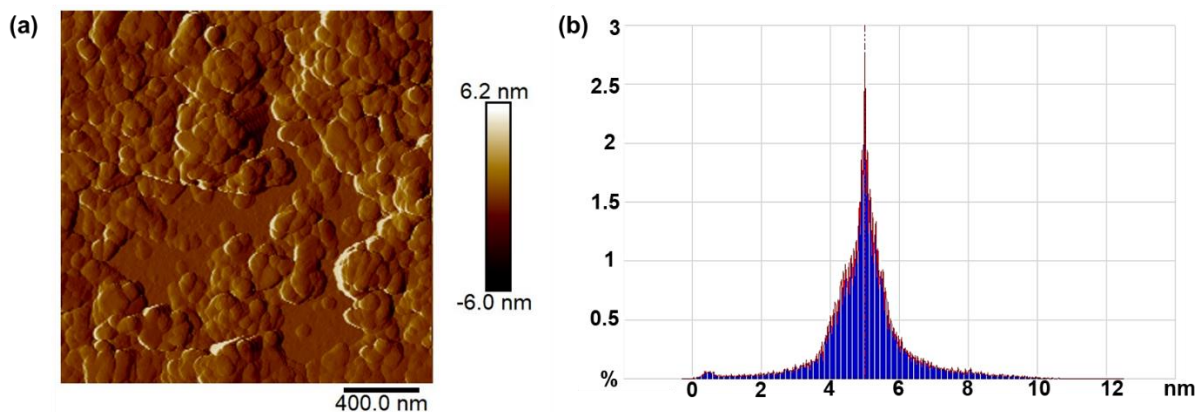

**Figure S36.** (a) Atomic force microscopy (AFM) images a selected region of  $\text{SnWO}_4$  particles and corresponding (b) depth profile obtained from the area indicated in (a).

## References:

1. H. K. Basak, M. K. Adak, A. Rajput and B. Chakraborty, *ACS Appl. Mater. Interfaces*, 2025, **17**, 9391-9406.
2. H. Qiu, Q. Chen, J. Zhang, X. An, Q. Liu, L. Xie, W. Yao, X. Sun and Q. Kong, *Inorg. Chem. Front.*, 2023, **10**, 3909-3915.
3. X. Bai, K. Zhou, L. Lin, H. Li, Q. Li and G. Fan, *Fuel*, 2024, **376**, 132746.
4. Q. Gong, H. Zhao, W.-D. Zhang, J.-D. Feng, Y. Zhang, Y. Zhang, J. Liu, B. Liu, J. Zhang, X. Yang, J. Wang and X. Yan, *Chem. Eng. J.*, 2025, **504**, 158819.
5. Z. Xue, C. Sun, M. Zhao, Y. Cui, Y. Qu, H. Ma, Z. Wang and Q. Jiang, *ACS Appl. Mater. Interfaces*, 2021, **13**, 59834-59842.
6. R. Qi, Q. Jiang, M. Zhong, W. Li, S. Ren, Y. Wang, M. Feng and X. Lu, *Chem. Eng. J.*, 2024, **496**, 154094.
7. L. Wang, H.-N. Liu, X. Meng, C.-H. Sun, H.-D. Liu, L.-Y. Gong, Z.-H. Yan and J. Wang, *Rare Met.*, 2024, **43**, 2851-2858.
8. Y. Ran, T. Li, C. Zhong, Y. Wang, C. Li and W. Hu, *J. Alloys Compd.*, 2025, **1026**, 180522.
9. G. Zhang, F. Wang, K. Chen, J. Kang and K. Chu, *Adv. Funct. Mater.*, 2024, **34**, 2305372.
10. S. Gautam, A. Kundu, L. Mallick and B. Chakraborty, *J. Mater. Chem. A*, 2025, **13**, 41972-41985.
11. L. Mallick, H. V. Annadata and B. Chakraborty, *ACS Appl. Mater. Interfaces*, 2024, **16**, 32385-32393.
